# Supplementary material for: Diagnostic Accuracy of Contrast-Enhanced Ultrasound (CEUS) in the Detection of Muscle-Invasive Bladder Cancer: A Systematic Review and Diagnostic Meta-Analysis
Source: MDPI journal article supplement (doi:10.3390/curroncol31020060), 2024-02-01
Supplement: s1 [file s1]

**Supplementary Table 1.** Quality assessment of the studies according to QUADAS-2.

| Study            | RISK OF BIAS      |            |                    |                 | APPLICABILITY CONCERNS |            |                    |
|------------------|-------------------|------------|--------------------|-----------------|------------------------|------------|--------------------|
|                  | PATIENT SELECTION | INDEX TEST | REFERENCE STANDARD | FLOW AND TIMING | PATIENT SELECTION      | INDEX TEST | REFERENCE STANDARD |
| Caruso 2010 [16] |                   |            |                    |                 |                        |            |                    |
| Li 2012 [17]     |                   |            |                    |                 |                        |            |                    |
| Gupta 2016 [18]  |                   |            |                    |                 |                        |            |                    |
| Li 2021 [19]     |                   |            |                    |                 |                        |            |                    |
| Fu 2023 [20]     |                   |            |                    |                 |                        |            |                    |

Low Risk
